# Supplementary material
Source: HighWire-hosted journal article supplement (http://molpharm.aspetjournals.org/highwire/filestream/76528/field_highwire_adjunct_files/4/online_Figure_4S.pdf)

Figure 4S

**A**

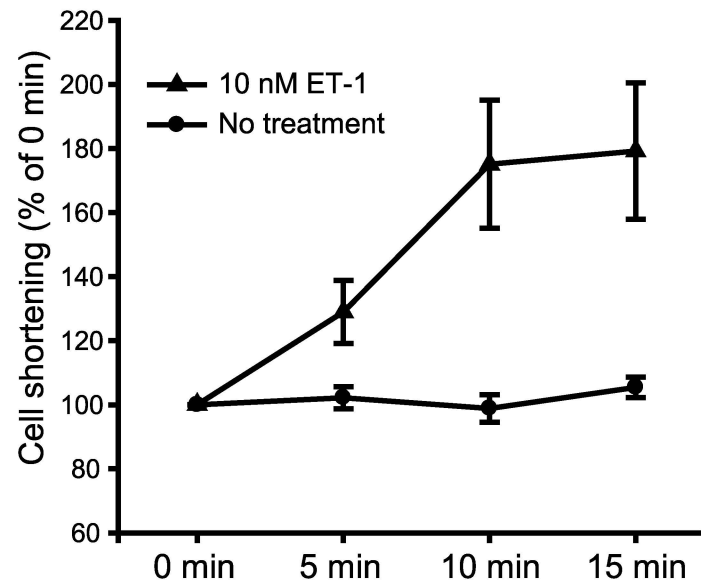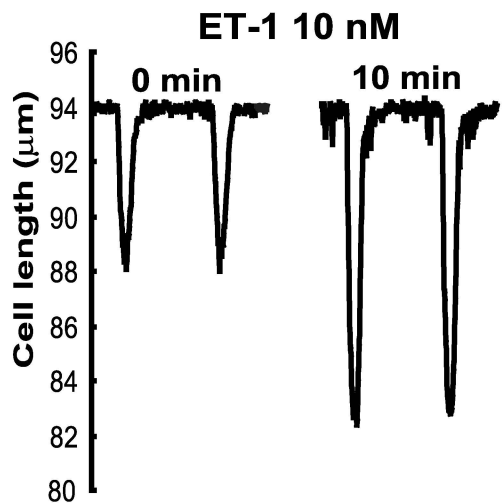

**B**

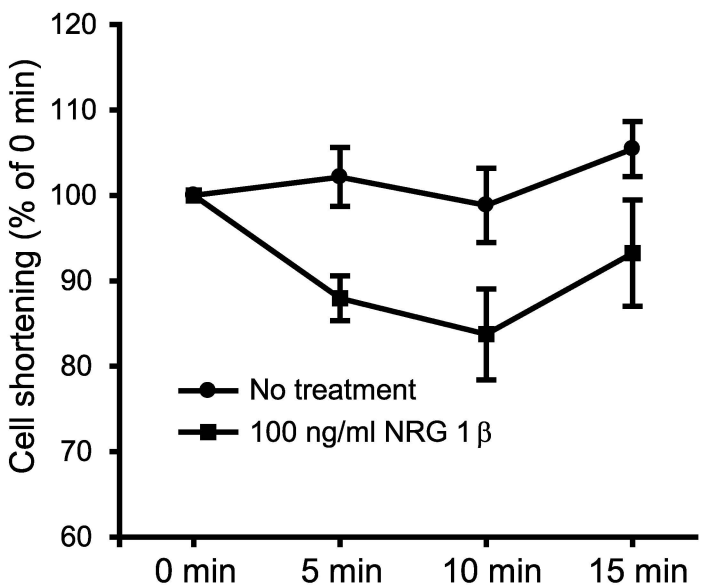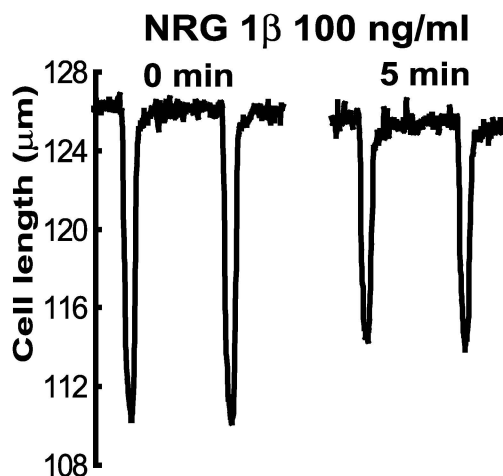

Supplement: online_Figure_4S.pdf [file online_Figure_4S.pdf]
